# Supplementary material for: A novel model of adenine-induced tubulointerstitial nephropathy in mice
Source: Springer Nature journal article supplement (doi:10.1186/1471-2369-14-116), 2013-05-30

**A.**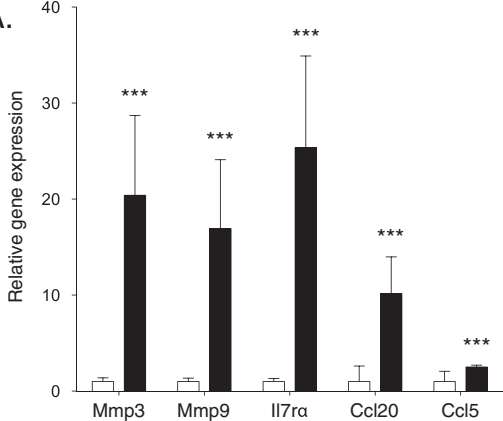**B.**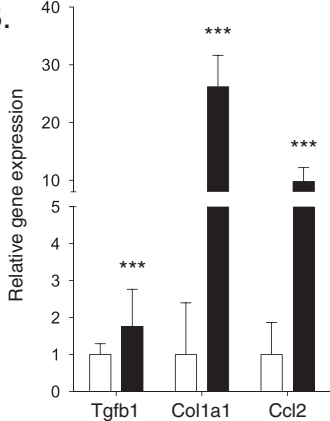

Supplement: 12882_2012_545_MOESM8_ESM.pdf [file 12882_2012_545_MOESM8_ESM.pdf]
